# Supplementary material
Source: PubMed Central journal article supplement (PMC2670628)
Supplement: supp_90839.2008_figS1.pdf [file supp_90839.2008_figS1.pdf]

A.

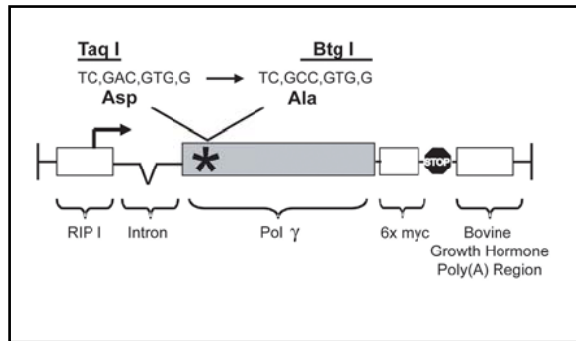

B.

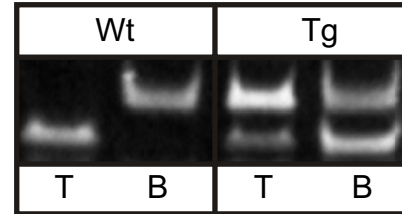C. RIP1-poly<sup>Exo(-)</sup>-myc-C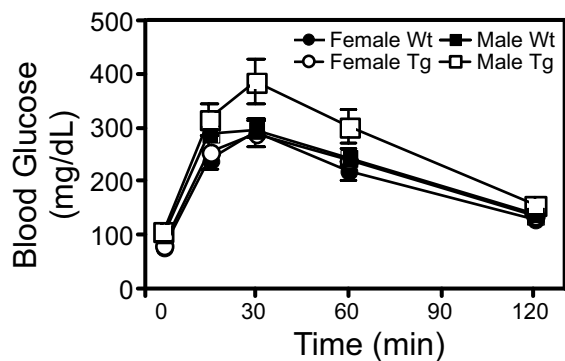

D.

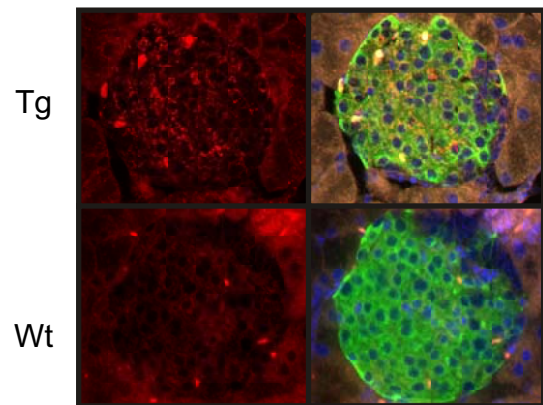

**Supplementary Figure 1. Confirmation of the phenotype in RIP1-Poly<sup>Exo(-)</sup>-myc B-D lines.** (a) Schematic representation of a second myc-epitope tagged construct that was used to generate additional transgenic lines. (b) Total RNA from islets isolated from WT and Tg mice was amplified by RT-PCR and digested with either TaqI (T) or BtgI (B) to determine relative expression levels of endogenous (TaqI digested) and transgenic (BtgI digested) forms of Pol $\gamma$ . Transgenic mice from all three lines express both endogenous Pol $\gamma$  and the transgene in isolated islets (line D shown) in contrast to the original founder line, which only expresses the transgene (cf. Fig. 1C). (c) To determine alterations in glucose homeostasis, oral glucose tolerance tests were performed on RIP1-Poly<sup>Exo(-)</sup>-myc B-D WT and Tg mice at 6 weeks of age. Lines B and D display a mild impairment in glucose tolerance (not shown). In RIP1-Poly<sup>Exo(-)</sup>-myc-C glucose tolerance in males is significantly impaired. (d) To evaluate expression and cellular localization of the transgene, pancreatic sections from nine-week-old male mice were stained with antibodies to myc (red) and insulin (green) (representative islet from a RIP1-Poly<sup>Exo(-)</sup>-myc B line WT and Tg mice). Nearly all insulin-containing cells express the myc epitope-tag; however, the intensity of myc staining varied from cell to cell. Consistent with a mitochondrial distribution, myc staining is punctate and surrounds  $\beta$ -cell nuclei (e).
